# Supplementary material for: Sensitivity and specificity of monocyte distribution width (MDW) in detecting patients with infection and sepsis in patients on sepsis pathway in the emergency department
Source: Infection. 2022 Nov 18;51(3):715–27. doi: 10.1007/s15010-022-01956-y (PMC9672566; doi:10.1007/s15010-022-01956-y)
Supplement: Supplementary file 1 — Supplementary file1 (XLSX 474 KB) [file 15010_2022_1956_MOESM1_ESM.xlsx]

## Sheet: abbreviations
#	Abbreviation used in this file	Meaning
1	#	Row number
2	se	Test sensitivity
3	sp	Test specificity
4	diag.acc	Diagnostic accuracy
5	diag.or	Diagnostic odds ratio
6	youden	Youden's index
7	ppv	Positive predictive value
8	npv	Negative predictive value
9	plr	Likelihood ratio of a positive test
10	nlr	Likelihood ratio of a negative test
11	crp.m100	CRP≤100
12	crp.m20	CRP≤20
13	lct.m2	LCT≤2
14	lct.m3.9	LCT≤3≤9
15	mdw.crp.m100	MDW≤20 & CRP≤100
16	mdw.crp.m20	MDW≤20 & CRP≤20
17	mdw.lct.m2	MDW≤20 & LCT≤2
18	mdw.lct.m3.9	MDW≤20 & LCT≤3≤9
19	mdw.m20	MDW≤20
20	mdw.nlr.m3	MDW≤20 & NLR≤3
21	mdw.nlr.m9	MDW≤20 & NLR≤9
22	mdw.wbch	MDW≤20 & WCC≤11
23	mdw.wbch.nlr.m3	MDW≤20 & WCC≤11 & NLR≤3
24	mdw.wbch.nlr.m9	MDW≤20 & WCC≤11 & NLR≤9
25	nlr.m3	NLR≤3
26	nlr.m9	NLR≤9
27	wbc.hi	WCC≤11
28	mdw	MDW
29	wbc	WBC
30	nlr	NLR
31	crp	CRP
32	lct	LCT
33	mdw_wbc	MDW & WCC
34	mdw_nlr	MDW & NLR
35	mdw_wbc_nlr	MDW & WCC & NLR
36	mdw_crp	MDW & CRP
37	mdw_lct	MDW & LCT

## Sheet: sepsis_scores_calculation
SIRS	Score	Variable / Parameter		SOFA
	1	Heart rate >90 beats/min		SOFA score is a measure of organ failure over time based on six different scores reflecting the function of six organ systems (respiratory, hepatic, coagulation, renal, cardiovascular and central nervous systems).
	1	Respiratory rate >20 breaths/min)		Each system is attributed a score between 0 and 4 on the basis of laboratory measurements and clinical assessment.
	1	Temperature >38°C or <36°C		SOFA scores are calculated as the difference between system scores at admission and baseline.
	1	WBC >1200/mm3 or <4000/mm3		The baseline score (in each system) was assumed zero in participants not known to have pre-existing organ dysfunction.
				Cardiovascular baseline score was assumed zero for all participants.
qSOFA	Score	Variable / Parameter		Respiratory baseline score was zero for all who was not on LTOT and 2 for those who were on LTOT.
	1	Systolic blood pressure ≤100 mm Hg		All scores were calculated following guidelines recommended by Singer, et.al (2016); with exception of respiratory and cardiovascular system.
	1	Respiratory rate ≥22/min		For respiratory we used the modified SOFA recommendations (Grissom, et.al 2010) whereby saturation was measured by a pulse oximeter (SpO2) was used instead of PaO2.
	1	Alteration in mental status (GCS drop)		For cardiovascular we used a proxy calculation as shown below.
REDS	Score	Variable / Parameter		Organ System	Paramenter	Score_0	Score_1	Score_2	Score_3	Score_4
qSOFA	1	Systolic blood pressure ≤100 mm Hg		Respiratory	PaO2/FiO2	>400	(315, 400]	(235, 315]	(150, 235]	≤150
qSOFA	1	Respiratory rate ≥22/min		Coagulation	Platelets 10^9/l	≥150	[100, 150)	[50, 100)	[20, 50)	<20
qSOFA	1	Alteration in mental status (GCS drop)		Liver	Bilirubin, mmol/l	<20	[20, 33)	[33, 102)	[102, 204)	≥204
Missed	1	Age ≥65 years		Cardiovascular	MAP, mmHg	≥70	≤70 (no RH)	--	RH
Missed	1	International Normalised Ratio (INR ≥ 1.3) and not on warfarin or DOAC		CNS	Glasgow Coma Score	15	[13, 15)	[10, 13)	[6, 10)	<6
Missed	1	Albumin ≤27 g/l		Renal	Creatinine (micromol/l)	<110	[110, 171)	[171, 300)	[300, 440)	≥440
Lactate (max)	0	Lactate ≤2 mmol/l
Lactate (max)	1	Lactate >2 mmol/l and <4 mmol/l
Lactate (max)	3	Lactate ≥4 mmol/l
RH	0	No RH
RH	2	RH and lactate (max) ≤2mmol/l
RH	3	RH and lactate (max) >2mmol/l

## Sheet: mdw_by_sepsis
#	Figure	Outcome	Stats	Sepsis Negative	Sepsis Positive	Total	pval.sirs
1	3	Sepsis-2 (SIRS)	Monocyte Dsitribution Width (units)				< 0.001
2	3	Sepsis-2 (SIRS)	Mean (SD)	21.5 (4.5)	23.6 (5.7)	22.9 (5.4)
3	3	Sepsis-2 (SIRS)	Median (IQR)	20.6 (18.1, 24.1)	22.5 (19.9, 26.2)	22.0 (19.3, 25.6)
4	3	Sepsis-2 (SIRS)	Range	13.1 - 41.0	13.0 - 85.0	13.0 - 85.0
5	3	Sepsis-2 (SIRS)	Total	837	1724	2561
6	3	Sepsis-2 (SIRS)	Missing	0	0	0
7	3	Sepsis-3 (qSOFA)	Monocyte Dsitribution Width (units)				< 0.001
8	3	Sepsis-3 (qSOFA)	Mean (SD)	22.6 (5.1)	24.3 (6.0)	23.0 (5.4)
9	3	Sepsis-3 (qSOFA)	Median (IQR)	21.7 (19.0, 25.2)	23.0 (20.3, 27.0)	22.0 (19.3, 25.6)
10	3	Sepsis-3 (qSOFA)	Range	13.0 - 85.0	13.8 - 62.8	13.0 - 85.0
11	3	Sepsis-3 (qSOFA)	Total	2012	558	2570
12	3	Sepsis-3 (qSOFA)	Missing	0	0	0
13	3	Sepsis-3 (SOFA)	Monocyte Dsitribution Width (units)				< 0.001
14	3	Sepsis-3 (SOFA)	Mean (SD)	22.3 (4.9)	24.9 (6.4)	23.0 (5.4)
15	3	Sepsis-3 (SOFA)	Median (IQR)	21.5 (19.0, 24.8)	23.7 (20.6, 27.8)	22.0 (19.3, 25.6)
16	3	Sepsis-3 (SOFA)	Range	13.1 - 85.0	13.0 - 62.8	13.0 - 85.0
17	3	Sepsis-3 (SOFA)	Total	1953	617	2570
18	3	Sepsis-3 (SOFA)	Missing	0	0	0
19	3	Sepsis (REDS)	Monocyte Dsitribution Width (units)				< 0.001
20	3	Sepsis (REDS)	Mean (SD)	22.3 (5.0)	23.9 (5.7)	23.0 (5.4)
21	3	Sepsis (REDS)	Median (IQR)	21.4 (18.7, 24.9)	22.8 (19.9, 26.3)	22.0 (19.3, 25.6)
22	3	Sepsis (REDS)	Range	13.0 - 85.0	13.5 - 62.8	13.0 - 85.0
23	3	Sepsis (REDS)	Total	1462	1108	2570
24	3	Sepsis (REDS)	Missing	0	0	0

## Sheet: mdw_by_scores
#	Figure	Infection	Score	Score Categories	MDW_Mean	MDW_SD	MDW_Q25	MDW_Median	MDW_Q75	MDW_Min	MDW_Max	N
1	6	No Infection	SIRS	0 to 1	19.65	3.58	16.95	18.84	21.28	13.98	32.92	120
2	6	No Infection	SIRS	2	20.38	4.45	17.38	19.25	21.58	14.03	36.67	96
3	6	No Infection	SIRS	3	19.99	3.76	17.44	19.05	21.7	14.24	33.64	67
4	6	No Infection	SIRS	4	19.13	3.79	17.65	18.37	19.54	13.09	28.7	13
5	6	No Infection	qSOFA	0 to 1	20.1	4.08	17.38	19.05	21.7	13.09	36.67	243
6	6	No Infection	qSOFA	2	18.84	3.04	16.68	17.99	20.22	13.98	28.23	45
7	6	No Infection	qSOFA	3	20.55	3.27	17.92	19.53	23.44	16.64	25.76	9
8	6	No Infection	SOFA	0 to 1	19.64	3.97	16.89	18.78	21.02	13.09	36.67	225
9	6	No Infection	SOFA	2	20.58	3.2	18.2	19.87	22.68	15.5	27.33	32
10	6	No Infection	SOFA	3	20.16	3.86	17.84	20.26	22.01	13.98	28.23	12
11	6	No Infection	SOFA	4 or more4	21.3	4.26	17.94	19.62	23.7	16.64	32.92	28
12	6	No Infection	REDS	0 to 2	19.69	3.84	17.08	18.77	21.12	14.03	36.67	167
13	6	No Infection	REDS	3 to 4	20.18	4.24	17.31	19.04	21.71	13.98	33.64	91
14	6	No Infection	REDS	5 to 6	19.71	3.13	17.41	20.22	22.06	13.09	25.76	31
15	6	No Infection	REDS	7 to 12	22.47	4.69	18.66	21.86	24.86	17.39	30.95	8
16	6	Infection	SIRS	0 to 1	22.4	4.5	19.21	22.06	25	13.43	40.98	541
17	6	Infection	SIRS	2	23.16	4.93	19.48	22.44	26.01	13.25	53.88	791
18	6	Infection	SIRS	3	23.85	5.9	20.24	22.53	26.27	13	84.95	703
19	6	Infection	SIRS	4	24.65	6.99	20.23	23.06	26.74	13.18	62.8	230
20	6	Infection	qSOFA	0 to 1	23.04	5.19	19.51	22.24	25.62	13	84.95	1715
21	6	Infection	qSOFA	2	24.14	5.9	20.26	22.96	26.45	13.85	62.8	514
22	6	Infection	qSOFA	3	26.1	7.35	20.7	24.73	29.25	15.72	46.71	44
23	6	Infection	SOFA	0 to 1	22.77	4.9	19.42	21.97	25.23	13.18	84.95	1656
24	6	Infection	SOFA	2	23.67	5.26	20.14	22.79	26.4	13	50.42	294
25	6	Infection	SOFA	3	25.05	5.73	21.35	24.23	28.16	14.22	50.09	112
26	6	Infection	SOFA	4 or more4	26.59	7.73	21.2	24.91	29.91	15.54	62.8	211
27	6	Infection	REDS	0 to 2	22.85	5.09	19.39	22.15	25.52	13	84.95	1165
28	6	Infection	REDS	3 to 4	23.06	4.6	19.71	22.48	25.62	13.51	44.86	814
29	6	Infection	REDS	5 to 6	24.74	6.49	20.51	22.92	27.72	14.69	52.87	217
30	6	Infection	REDS	7 to 12	30.05	9.24	23.15	28.69	35.81	16.66	62.8	77
31	7	Bacteremia	SIRS	0 to 1	28.08	7.8	22.69	26.31	34.34	18.09	40.98	18
32	7	Bacteremia	SIRS	2	27.4	7.44	22.26	26.27	30.52	15.92	53.88	40
33	7	Bacteremia	SIRS	3	28.04	7.3	22.43	27.19	33.64	13	42.37	51
34	7	Bacteremia	SIRS	4	29.29	10.45	20.97	25.64	34.11	17.59	62.8	33
35	7	Bacteremia	qSOFA	0 to 1	27.26	7.61	22.06	25.88	30.72	13	53.88	93
36	7	Bacteremia	qSOFA	2	29.01	8.55	23.2	27.21	34.63	18.09	62.8	40
37	7	Bacteremia	qSOFA	3	33.62	10.41	21.35	37.44	41.07	19.36	46.71	9
38	7	Bacteremia	SOFA	0 to 1	26.09	6.16	21.68	24.06	30	15.92	41.47	69
39	7	Bacteremia	SOFA	2	25.8	5.96	22.11	26.47	29.86	13	39.03	19
40	7	Bacteremia	SOFA	3	28.68	8.02	22.42	27.44	34.75	18.45	42.72	13
41	7	Bacteremia	SOFA	4 or more4	32.55	10.27	23.93	34.59	38.68	16.64	62.8	41
42	7	Bacteremia	REDS	0 to 2	27.05	7.79	21.82	26.56	31.01	13	53.88	47
43	7	Bacteremia	REDS	3 to 4	25.4	5.73	21.21	23.9	28.09	15.92	41.47	51
44	7	Bacteremia	REDS	5 to 6	28.76	7.77	22.44	24.95	35.24	18.82	42.72	22
45	7	Bacteremia	REDS	7 to 12	36.32	9.24	32.09	36.39	40.55	19.36	62.8	22
46	7	Covid-19	SIRS	0 to 1	24.59	3.67	22.67	24.47	26.73	15.55	36.54	155
47	7	Covid-19	SIRS	2	25.17	3.89	22.62	24.91	27.7	14.51	36.85	211
48	7	Covid-19	SIRS	3	26.21	6.94	22.88	24.93	28.29	15.3	84.95	127
49	7	Covid-19	SIRS	4	27.07	7.11	22.69	25.61	28.47	18.3	52.87	33
50	7	Covid-19	qSOFA	0 to 1	25.26	5.13	22.54	24.81	27.6	14.51	84.95	398
51	7	Covid-19	qSOFA	2	25.81	4.84	22.87	25	27.63	18.56	52.87	127
52	7	Covid-19	qSOFA	3	26.69	2.67	24.48	28	28.28	23.25	29.44	5
53	7	Covid-19	SOFA	0 to 1	25.25	5.25	22.51	24.81	27.61	14.51	84.95	385
54	7	Covid-19	SOFA	2	25.35	4.15	22.67	24.81	27.92	18.65	36.41	57
55	7	Covid-19	SOFA	3	25.41	3.79	23.06	25.07	27.06	16.62	35.46	29
56	7	Covid-19	SOFA	4 or more4	26.44	4.95	23.71	25.22	27.74	15.55	39.78	59
57	7	Covid-19	REDS	0 to 2	25.06	5.22	22.44	24.66	27.19	14.51	84.95	284
58	7	Covid-19	REDS	3 to 4	25.58	4.45	22.87	25.02	27.7	17.94	44.86	194
59	7	Covid-19	REDS	5 to 6	26.38	5.67	23.69	25.28	28.24	15.55	52.87	43
60	7	Covid-19	REDS	7 to 12	27.65	7.42	22.78	26.45	29.44	17.23	39.78	9

## Sheet: sepsis_crosstabs
#	Outcome	Marker	TP_a	FP_b	FN_c	TN_d	Total	NA_marker	NA_outcome	D_ac_comp	H_bd_comp	P_ab_comp	N_cd_comp
1	Sepsis-2 (SIRS)	crp.m100	793	259	922	568	2542	19	9	1715	827	1052	1490
2	Sepsis-2 (SIRS)	crp.m20	1440	582	275	245	2542	19	9	1715	827	2022	520
3	Sepsis-2 (SIRS)	lct.m2	562	232	1162	605	2561	0	9	1724	837	794	1767
4	Sepsis-2 (SIRS)	lct.m3.9	164	58	1560	779	2561	0	9	1724	837	222	2339
5	Sepsis-2 (SIRS)	mdw.crp.m100	681	209	1036	626	2552	9	9	1717	835	890	1662
6	Sepsis-2 (SIRS)	mdw.crp.m20	1146	404	571	431	2552	9	9	1717	835	1550	1002
7	Sepsis-2 (SIRS)	mdw.lct.m2	417	118	1307	719	2561	0	9	1724	837	535	2026
8	Sepsis-2 (SIRS)	mdw.lct.m3.9	128	26	1596	811	2561	0	9	1724	837	154	2407
9	Sepsis-2 (SIRS)	mdw.m20	1268	467	456	370	2561	0	9	1724	837	1735	826
10	Sepsis-2 (SIRS)	mdw.nlr.m3	1146	414	576	423	2559	8	9	1722	837	1560	999
11	Sepsis-2 (SIRS)	mdw.nlr.m9	707	188	1015	649	2559	8	9	1722	837	895	1664
12	Sepsis-2 (SIRS)	mdw.wbch	717	129	1007	708	2561	6	9	1724	837	846	1715
13	Sepsis-2 (SIRS)	mdw.wbch.nlr.m3	687	126	1037	711	2561	6	9	1724	837	813	1748
14	Sepsis-2 (SIRS)	mdw.wbch.nlr.m9	521	83	1203	754	2561	6	9	1724	837	604	1957
15	Sepsis-2 (SIRS)	nlr.m3	1564	705	158	132	2559	11	9	1722	837	2269	290
16	Sepsis-2 (SIRS)	nlr.m9	936	309	786	528	2559	11	9	1722	837	1245	1314
17	Sepsis-2 (SIRS)	wbc.hi	1036	261	688	576	2561	9	9	1724	837	1297	1264
18	Sepsis-3 (qSOFA)	crp.m100	255	800	297	1199	2551	19	0	552	1999	1055	1496
19	Sepsis-3 (qSOFA)	crp.m20	463	1566	89	433	2551	19	0	552	1999	2029	522
20	Sepsis-3 (qSOFA)	lct.m2	231	566	327	1446	2570	0	0	558	2012	797	1773
21	Sepsis-3 (qSOFA)	lct.m3.9	93	129	465	1883	2570	0	0	558	2012	222	2348
22	Sepsis-3 (qSOFA)	mdw.crp.m100	225	668	327	1341	2561	9	0	552	2009	893	1668
23	Sepsis-3 (qSOFA)	mdw.crp.m20	383	1173	169	836	2561	9	0	552	2009	1556	1005
24	Sepsis-3 (qSOFA)	mdw.lct.m2	178	360	380	1652	2570	0	0	558	2012	538	2032
25	Sepsis-3 (qSOFA)	mdw.lct.m3.9	76	78	482	1934	2570	0	0	558	2012	154	2416
26	Sepsis-3 (qSOFA)	mdw.m20	426	1315	132	697	2570	0	0	558	2012	1741	829
27	Sepsis-3 (qSOFA)	mdw.nlr.m3	401	1159	157	845	2562	8	0	558	2004	1560	1002
28	Sepsis-3 (qSOFA)	mdw.nlr.m9	236	659	322	1345	2562	8	0	558	2004	895	1667
29	Sepsis-3 (qSOFA)	mdw.wbch	223	623	335	1383	2564	6	0	558	2006	846	1718
30	Sepsis-3 (qSOFA)	mdw.wbch.nlr.m3	219	594	339	1412	2564	6	0	558	2006	813	1751
31	Sepsis-3 (qSOFA)	mdw.wbch.nlr.m9	162	442	396	1564	2564	6	0	558	2006	604	1960
32	Sepsis-3 (qSOFA)	nlr.m3	521	1748	36	254	2559	11	0	557	2002	2269	290
33	Sepsis-3 (qSOFA)	nlr.m9	307	938	250	1064	2559	11	0	557	2002	1245	1314
34	Sepsis-3 (qSOFA)	wbc.hi	301	996	256	1008	2561	9	0	557	2004	1297	1264
35	Sepsis-3 (SOFA)	crp.m100	305	750	309	1187	2551	19	0	614	1937	1055	1496
36	Sepsis-3 (SOFA)	crp.m20	523	1506	91	431	2551	19	0	614	1937	2029	522
37	Sepsis-3 (SOFA)	lct.m2	287	510	330	1443	2570	0	0	617	1953	797	1773
38	Sepsis-3 (SOFA)	lct.m3.9	105	117	512	1836	2570	0	0	617	1953	222	2348
39	Sepsis-3 (SOFA)	mdw.crp.m100	281	612	334	1334	2561	9	0	615	1946	893	1668
40	Sepsis-3 (SOFA)	mdw.crp.m20	449	1107	166	839	2561	9	0	615	1946	1556	1005
41	Sepsis-3 (SOFA)	mdw.lct.m2	231	307	386	1646	2570	0	0	617	1953	538	2032
42	Sepsis-3 (SOFA)	mdw.lct.m3.9	88	66	529	1887	2570	0	0	617	1953	154	2416
43	Sepsis-3 (SOFA)	mdw.m20	489	1252	128	701	2570	0	0	617	1953	1741	829
44	Sepsis-3 (SOFA)	mdw.nlr.m3	453	1107	162	840	2562	8	0	615	1947	1560	1002
45	Sepsis-3 (SOFA)	mdw.nlr.m9	297	598	318	1349	2562	8	0	615	1947	895	1667
46	Sepsis-3 (SOFA)	mdw.wbch	258	588	358	1360	2564	6	0	616	1948	846	1718
47	Sepsis-3 (SOFA)	mdw.wbch.nlr.m3	254	559	362	1389	2564	6	0	616	1948	813	1751
48	Sepsis-3 (SOFA)	mdw.wbch.nlr.m9	204	400	412	1548	2564	6	0	616	1948	604	1960
49	Sepsis-3 (SOFA)	nlr.m3	570	1699	44	246	2559	11	0	614	1945	2269	290
50	Sepsis-3 (SOFA)	nlr.m9	367	878	247	1067	2559	11	0	614	1945	1245	1314
51	Sepsis-3 (SOFA)	wbc.hi	333	964	282	982	2561	9	0	615	1946	1297	1264
52	Sepsis (REDS)	crp.m100	536	519	562	934	2551	19	0	1098	1453	1055	1496
53	Sepsis (REDS)	crp.m20	924	1105	174	348	2551	19	0	1098	1453	2029	522
54	Sepsis (REDS)	lct.m2	610	187	498	1275	2570	0	0	1108	1462	797	1773
55	Sepsis (REDS)	lct.m3.9	185	37	923	1425	2570	0	0	1108	1462	222	2348
56	Sepsis (REDS)	mdw.crp.m100	473	420	627	1041	2561	9	0	1100	1461	893	1668
57	Sepsis (REDS)	mdw.crp.m20	752	804	348	657	2561	9	0	1100	1461	1556	1005
58	Sepsis (REDS)	mdw.lct.m2	446	92	662	1370	2570	0	0	1108	1462	538	2032
59	Sepsis (REDS)	mdw.lct.m3.9	141	13	967	1449	2570	0	0	1108	1462	154	2416
60	Sepsis (REDS)	mdw.m20	827	914	281	548	2570	0	0	1108	1462	1741	829
61	Sepsis (REDS)	mdw.nlr.m3	771	789	333	669	2562	8	0	1104	1458	1560	1002
62	Sepsis (REDS)	mdw.nlr.m9	488	407	616	1051	2562	8	0	1104	1458	895	1667
63	Sepsis (REDS)	mdw.wbch	459	387	645	1073	2564	6	0	1104	1460	846	1718
64	Sepsis (REDS)	mdw.wbch.nlr.m3	448	365	656	1095	2564	6	0	1104	1460	813	1751
65	Sepsis (REDS)	mdw.wbch.nlr.m9	338	266	766	1194	2564	6	0	1104	1460	604	1960
66	Sepsis (REDS)	nlr.m3	1019	1250	84	206	2559	11	0	1103	1456	2269	290
67	Sepsis (REDS)	nlr.m9	627	618	476	838	2559	11	0	1103	1456	1245	1314
68	Sepsis (REDS)	wbc.hi	631	666	472	792	2561	9	0	1103	1458	1297	1264

## Sheet: sepsis_accuracy
#	Figure	Marker	Estimate	Est_Sepsis-2 (SIRS)	95%CI_Sepsis-2 (SIRS)	Est_Sepsis-3 (qSOFA)	95%CI_Sepsis-3 (qSOFA)	Est_Sepsis-3 (SOFA)	95%CI_Sepsis-3 (SOFA)	Est_Sepsis (REDS)	95%CI_Sepsis (REDS)
1	--	mdw.m20	se	0.74	(0.71, 0.76)	0.76	(0.73, 0.8)	0.79	(0.76, 0.82)	0.75	(0.72, 0.77)
2	--	mdw.m20	sp	0.44	(0.41, 0.48)	0.35	(0.33, 0.37)	0.36	(0.34, 0.38)	0.37	(0.35, 0.4)
3	--	mdw.m20	diag.acc	0.64	(0.62, 0.66)	0.44	(0.42, 0.46)	0.46	(0.44, 0.48)	0.54	(0.52, 0.55)
4	--	mdw.m20	diag.or	2.2	(1.85, 2.62)	1.71	(1.38, 2.12)	2.14	(1.72, 2.65)	1.76	(1.49, 2.1)
5	--	mdw.m20	youden	0.18	(0.12, 0.23)	0.11	(0.05, 0.17)	0.15	(0.1, 0.2)	0.12	(0.07, 0.17)
6	--	mdw.m20	ppv	0.73	(0.71, 0.75)	0.24	(0.22, 0.27)	0.28	(0.26, 0.3)	0.48	(0.45, 0.5)
7	5	mdw.m20	npv	0.45	(0.41, 0.48)	0.84	(0.81, 0.87)	0.85	(0.82, 0.87)	0.66	(0.63, 0.69)
8	5	mdw.m20	plr	1.32	(1.23, 1.41)	1.17	(1.1, 1.24)	1.24	(1.17, 1.3)	1.19	(1.13, 1.26)
9	--	mdw.m20	nlr	0.6	(0.54, 0.67)	0.68	(0.58, 0.8)	0.58	(0.49, 0.68)	0.68	(0.6, 0.76)
10	--	mdw.wbch	se	0.42	(0.39, 0.44)	0.4	(0.36, 0.44)	0.42	(0.38, 0.46)	0.42	(0.39, 0.45)
11	--	mdw.wbch	sp	0.85	(0.82, 0.87)	0.69	(0.67, 0.71)	0.7	(0.68, 0.72)	0.73	(0.71, 0.76)
12	--	mdw.wbch	diag.acc	0.56	(0.54, 0.58)	0.63	(0.61, 0.65)	0.63	(0.61, 0.65)	0.6	(0.58, 0.62)
13	--	mdw.wbch	diag.or	3.91	(3.17, 4.82)	1.48	(1.22, 1.79)	1.67	(1.38, 2.01)	1.97	(1.67, 2.33)
14	--	mdw.wbch	youden	0.26	(0.21, 0.31)	0.09	(0.03, 0.15)	0.12	(0.06, 0.18)	0.15	(0.1, 0.2)
15	--	mdw.wbch	ppv	0.85	(0.82, 0.87)	0.26	(0.23, 0.29)	0.3	(0.27, 0.34)	0.54	(0.51, 0.58)
16	5	mdw.wbch	npv	0.41	(0.39, 0.44)	0.81	(0.79, 0.82)	0.79	(0.77, 0.81)	0.62	(0.6, 0.65)
17	5	mdw.wbch	plr	2.7	(2.28, 3.19)	1.29	(1.14, 1.45)	1.39	(1.24, 1.56)	1.57	(1.4, 1.75)
18	--	mdw.wbch	nlr	0.69	(0.66, 0.73)	0.87	(0.81, 0.94)	0.83	(0.77, 0.9)	0.79	(0.75, 0.84)
19	--	mdw.nlr.m3	se	0.67	(0.64, 0.69)	0.72	(0.68, 0.76)	0.74	(0.7, 0.77)	0.7	(0.67, 0.73)
20	--	mdw.nlr.m3	sp	0.51	(0.47, 0.54)	0.42	(0.4, 0.44)	0.43	(0.41, 0.45)	0.46	(0.43, 0.48)
21	--	mdw.nlr.m3	diag.acc	0.61	(0.59, 0.63)	0.49	(0.47, 0.51)	0.5	(0.49, 0.52)	0.56	(0.54, 0.58)
22	--	mdw.nlr.m3	diag.or	2.03	(1.72, 2.41)	1.86	(1.52, 2.29)	2.12	(1.74, 2.59)	1.96	(1.67, 2.31)
23	--	mdw.nlr.m3	youden	0.17	(0.11, 0.23)	0.14	(0.08, 0.2)	0.17	(0.11, 0.22)	0.16	(0.1, 0.21)
24	--	mdw.nlr.m3	ppv	0.73	(0.71, 0.76)	0.26	(0.24, 0.28)	0.29	(0.27, 0.31)	0.49	(0.47, 0.52)
25	5	mdw.nlr.m3	npv	0.42	(0.39, 0.45)	0.84	(0.82, 0.87)	0.84	(0.81, 0.86)	0.67	(0.64, 0.7)
26	5	mdw.nlr.m3	plr	1.35	(1.25, 1.45)	1.24	(1.17, 1.32)	1.3	(1.22, 1.38)	1.29	(1.21, 1.37)
27	--	mdw.nlr.m3	nlr	0.66	(0.6, 0.73)	0.67	(0.58, 0.77)	0.61	(0.53, 0.7)	0.66	(0.59, 0.73)
28	--	mdw.nlr.m9	se	0.41	(0.39, 0.43)	0.42	(0.38, 0.47)	0.48	(0.44, 0.52)	0.44	(0.41, 0.47)
29	--	mdw.nlr.m9	sp	0.78	(0.75, 0.8)	0.67	(0.65, 0.69)	0.69	(0.67, 0.71)	0.72	(0.7, 0.74)
30	--	mdw.nlr.m9	diag.acc	0.53	(0.51, 0.55)	0.62	(0.6, 0.64)	0.64	(0.62, 0.66)	0.6	(0.58, 0.62)
31	--	mdw.nlr.m9	diag.or	2.4	(1.99, 2.9)	1.5	(1.23, 1.81)	2.11	(1.75, 2.54)	2.05	(1.73, 2.41)
32	--	mdw.nlr.m9	youden	0.19	(0.13, 0.24)	0.09	(0.03, 0.16)	0.18	(0.11, 0.24)	0.16	(0.11, 0.22)
33	--	mdw.nlr.m9	ppv	0.79	(0.76, 0.82)	0.26	(0.24, 0.29)	0.33	(0.3, 0.36)	0.55	(0.51, 0.58)
34	5	mdw.nlr.m9	npv	0.39	(0.37, 0.41)	0.81	(0.79, 0.83)	0.81	(0.79, 0.83)	0.63	(0.61, 0.65)
35	5	mdw.nlr.m9	plr	1.83	(1.59, 2.1)	1.29	(1.15, 1.44)	1.57	(1.41, 1.75)	1.58	(1.42, 1.76)
36	--	mdw.nlr.m9	nlr	0.76	(0.72, 0.8)	0.86	(0.8, 0.93)	0.75	(0.69, 0.81)	0.77	(0.73, 0.82)
37	--	mdw.wbch.nlr.m3	se	0.4	(0.38, 0.42)	0.39	(0.35, 0.43)	0.41	(0.37, 0.45)	0.41	(0.38, 0.44)
38	--	mdw.wbch.nlr.m3	sp	0.85	(0.82, 0.87)	0.7	(0.68, 0.72)	0.71	(0.69, 0.73)	0.75	(0.73, 0.77)
39	--	mdw.wbch.nlr.m3	diag.acc	0.55	(0.53, 0.57)	0.64	(0.62, 0.65)	0.64	(0.62, 0.66)	0.6	(0.58, 0.62)
40	--	mdw.wbch.nlr.m3	diag.or	3.74	(3.02, 4.62)	1.54	(1.26, 1.87)	1.74	(1.44, 2.1)	2.05	(1.73, 2.43)
41	--	mdw.wbch.nlr.m3	youden	0.25	(0.2, 0.3)	0.1	(0.04, 0.16)	0.13	(0.07, 0.19)	0.16	(0.1, 0.21)
42	--	mdw.wbch.nlr.m3	ppv	0.85	(0.82, 0.87)	0.27	(0.24, 0.3)	0.31	(0.28, 0.35)	0.55	(0.52, 0.59)
43	5	mdw.wbch.nlr.m3	npv	0.41	(0.38, 0.43)	0.81	(0.79, 0.82)	0.79	(0.77, 0.81)	0.63	(0.6, 0.65)
44	5	mdw.wbch.nlr.m3	plr	2.65	(2.23, 3.14)	1.33	(1.17, 1.5)	1.44	(1.28, 1.62)	1.62	(1.45, 1.82)
45	--	mdw.wbch.nlr.m3	nlr	0.71	(0.68, 0.74)	0.86	(0.8, 0.93)	0.82	(0.77, 0.89)	0.79	(0.75, 0.84)
46	--	mdw.wbch.nlr.m9	se	0.3	(0.28, 0.32)	0.29	(0.25, 0.33)	0.33	(0.29, 0.37)	0.31	(0.28, 0.33)
47	--	mdw.wbch.nlr.m9	sp	0.9	(0.88, 0.92)	0.78	(0.76, 0.8)	0.79	(0.78, 0.81)	0.82	(0.8, 0.84)
48	--	mdw.wbch.nlr.m9	diag.acc	0.5	(0.48, 0.52)	0.67	(0.65, 0.69)	0.68	(0.66, 0.7)	0.6	(0.58, 0.62)
49	--	mdw.wbch.nlr.m9	diag.or	3.93	(3.07, 5.05)	1.45	(1.17, 1.79)	1.92	(1.57, 2.34)	1.98	(1.65, 2.38)
50	--	mdw.wbch.nlr.m9	youden	0.2	(0.16, 0.24)	0.07	(0.01, 0.13)	0.13	(0.07, 0.18)	0.12	(0.08, 0.17)
51	--	mdw.wbch.nlr.m9	ppv	0.86	(0.83, 0.89)	0.27	(0.23, 0.31)	0.34	(0.3, 0.38)	0.56	(0.52, 0.6)
52	5	mdw.wbch.nlr.m9	npv	0.39	(0.36, 0.41)	0.8	(0.78, 0.82)	0.79	(0.77, 0.81)	0.61	(0.59, 0.63)
53	5	mdw.wbch.nlr.m9	plr	3.05	(2.45, 3.78)	1.32	(1.13, 1.54)	1.61	(1.4, 1.86)	1.68	(1.46, 1.93)
54	--	mdw.wbch.nlr.m9	nlr	0.77	(0.75, 0.8)	0.91	(0.86, 0.96)	0.84	(0.79, 0.89)	0.85	(0.81, 0.89)
55	--	mdw.crp.m20	se	0.67	(0.64, 0.69)	0.69	(0.65, 0.73)	0.73	(0.69, 0.76)	0.68	(0.66, 0.71)
56	--	mdw.crp.m20	sp	0.52	(0.48, 0.55)	0.42	(0.39, 0.44)	0.43	(0.41, 0.45)	0.45	(0.42, 0.48)
57	--	mdw.crp.m20	diag.acc	0.62	(0.6, 0.64)	0.48	(0.46, 0.5)	0.5	(0.48, 0.52)	0.55	(0.53, 0.57)
58	--	mdw.crp.m20	diag.or	2.14	(1.81, 2.53)	1.62	(1.32, 1.98)	2.05	(1.68, 2.5)	1.77	(1.5, 2.08)
59	--	mdw.crp.m20	youden	0.18	(0.13, 0.24)	0.11	(0.05, 0.17)	0.16	(0.1, 0.22)	0.13	(0.08, 0.19)
60	--	mdw.crp.m20	ppv	0.74	(0.72, 0.76)	0.25	(0.22, 0.27)	0.29	(0.27, 0.31)	0.48	(0.46, 0.51)
61	5	mdw.crp.m20	npv	0.43	(0.4, 0.46)	0.83	(0.81, 0.85)	0.83	(0.81, 0.86)	0.65	(0.62, 0.68)
62	5	mdw.crp.m20	plr	1.38	(1.28, 1.49)	1.19	(1.11, 1.27)	1.28	(1.21, 1.37)	1.24	(1.17, 1.32)
63	--	mdw.crp.m20	nlr	0.64	(0.59, 0.71)	0.74	(0.64, 0.84)	0.63	(0.54, 0.72)	0.7	(0.63, 0.78)
64	--	mdw.crp.m100	se	0.4	(0.37, 0.42)	0.41	(0.37, 0.45)	0.46	(0.42, 0.5)	0.43	(0.4, 0.46)
65	--	mdw.crp.m100	sp	0.75	(0.72, 0.78)	0.67	(0.65, 0.69)	0.69	(0.66, 0.71)	0.71	(0.69, 0.74)
66	--	mdw.crp.m100	diag.acc	0.51	(0.49, 0.53)	0.61	(0.59, 0.63)	0.63	(0.61, 0.65)	0.59	(0.57, 0.61)
67	--	mdw.crp.m100	diag.or	1.97	(1.64, 2.37)	1.38	(1.14, 1.68)	1.83	(1.52, 2.21)	1.87	(1.59, 2.2)
68	--	mdw.crp.m100	youden	0.15	(0.09, 0.2)	0.08	(0.01, 0.14)	0.14	(0.08, 0.2)	0.14	(0.09, 0.2)
69	--	mdw.crp.m100	ppv	0.77	(0.74, 0.79)	0.25	(0.22, 0.28)	0.31	(0.28, 0.35)	0.53	(0.5, 0.56)
70	5	mdw.crp.m100	npv	0.38	(0.35, 0.4)	0.8	(0.78, 0.82)	0.8	(0.78, 0.82)	0.62	(0.6, 0.65)
71	5	mdw.crp.m100	plr	1.58	(1.39, 1.81)	1.23	(1.09, 1.38)	1.45	(1.3, 1.62)	1.5	(1.35, 1.66)
72	--	mdw.crp.m100	nlr	0.8	(0.76, 0.85)	0.89	(0.82, 0.96)	0.79	(0.73, 0.86)	0.8	(0.75, 0.85)
73	--	mdw.lct.m2	se	0.24	(0.22, 0.26)	0.32	(0.28, 0.36)	0.37	(0.34, 0.41)	0.4	(0.37, 0.43)
74	--	mdw.lct.m2	sp	0.86	(0.83, 0.88)	0.82	(0.8, 0.84)	0.84	(0.83, 0.86)	0.94	(0.92, 0.95)
75	--	mdw.lct.m2	diag.acc	0.44	(0.42, 0.46)	0.71	(0.69, 0.73)	0.73	(0.71, 0.75)	0.71	(0.69, 0.72)
76	--	mdw.lct.m2	diag.or	1.94	(1.55, 2.43)	2.15	(1.74, 2.66)	3.21	(2.62, 3.93)	10.03	(7.87, 12.79)
77	--	mdw.lct.m2	youden	0.1	(0.06, 0.14)	0.14	(0.08, 0.2)	0.22	(0.16, 0.27)	0.34	(0.3, 0.38)
78	--	mdw.lct.m2	ppv	0.78	(0.74, 0.81)	0.33	(0.29, 0.37)	0.43	(0.39, 0.47)	0.83	(0.79, 0.86)
79	5	mdw.lct.m2	npv	0.35	(0.33, 0.38)	0.81	(0.8, 0.83)	0.81	(0.79, 0.83)	0.67	(0.65, 0.69)
80	5	mdw.lct.m2	plr	1.72	(1.42, 2.07)	1.78	(1.53, 2.08)	2.38	(2.06, 2.75)	6.4	(5.18, 7.89)
81	--	mdw.lct.m2	nlr	0.88	(0.85, 0.92)	0.83	(0.78, 0.88)	0.74	(0.7, 0.79)	0.64	(0.61, 0.67)
82	--	mdw.lct.m3.9	se	0.07	(0.06, 0.09)	0.14	(0.11, 0.17)	0.14	(0.12, 0.17)	0.13	(0.11, 0.15)
83	--	mdw.lct.m3.9	sp	0.97	(0.95, 0.98)	0.96	(0.95, 0.97)	0.97	(0.96, 0.97)	0.99	(0.98, 1)
84	--	mdw.lct.m3.9	diag.acc	0.37	(0.35, 0.39)	0.78	(0.77, 0.8)	0.77	(0.75, 0.78)	0.62	(0.6, 0.64)
85	--	mdw.lct.m3.9	diag.or	2.5	(1.63, 3.85)	3.91	(2.81, 5.45)	4.76	(3.41, 6.64)	16.25	(9.16, 28.85)
86	--	mdw.lct.m3.9	youden	0.04	(0.02, 0.07)	0.1	(0.06, 0.14)	0.11	(0.07, 0.15)	0.12	(0.09, 0.14)
87	--	mdw.lct.m3.9	ppv	0.83	(0.76, 0.89)	0.49	(0.41, 0.58)	0.57	(0.49, 0.65)	0.92	(0.86, 0.95)
88	5	mdw.lct.m3.9	npv	0.34	(0.32, 0.36)	0.8	(0.78, 0.82)	0.78	(0.76, 0.8)	0.6	(0.58, 0.62)
89	5	mdw.lct.m3.9	plr	2.39	(1.58, 3.61)	3.51	(2.6, 4.75)	4.22	(3.11, 5.73)	14.31	(8.15, 25.12)
90	--	mdw.lct.m3.9	nlr	0.96	(0.94, 0.97)	0.9	(0.87, 0.93)	0.89	(0.86, 0.92)	0.88	(0.86, 0.9)
91	--	wbc.hi	se	0.6	(0.58, 0.62)	0.54	(0.5, 0.58)	0.54	(0.5, 0.58)	0.57	(0.54, 0.6)
92	--	wbc.hi	sp	0.69	(0.66, 0.72)	0.5	(0.48, 0.53)	0.5	(0.48, 0.53)	0.54	(0.52, 0.57)
93	--	wbc.hi	diag.acc	0.63	(0.61, 0.65)	0.51	(0.49, 0.53)	0.51	(0.49, 0.53)	0.56	(0.54, 0.58)
94	--	wbc.hi	diag.or	3.32	(2.79, 3.96)	1.19	(0.99, 1.44)	1.2	(1, 1.44)	1.59	(1.36, 1.86)
95	--	wbc.hi	youden	0.29	(0.23, 0.34)	0.04	(-0.02, 0.11)	0.05	(-0.02, 0.11)	0.12	(0.06, 0.17)
96	--	wbc.hi	ppv	0.8	(0.78, 0.82)	0.23	(0.21, 0.26)	0.26	(0.23, 0.28)	0.49	(0.46, 0.51)
97	5	wbc.hi	npv	0.46	(0.43, 0.48)	0.8	(0.77, 0.82)	0.78	(0.75, 0.8)	0.63	(0.6, 0.65)
98	5	wbc.hi	plr	1.93	(1.73, 2.15)	1.09	(1, 1.19)	1.09	(1, 1.19)	1.25	(1.16, 1.35)
99	--	wbc.hi	nlr	0.58	(0.54, 0.62)	0.91	(0.83, 1.01)	0.91	(0.83, 1)	0.79	(0.73, 0.86)
100	--	nlr.m3	se	0.91	(0.89, 0.92)	0.94	(0.91, 0.95)	0.93	(0.9, 0.95)	0.92	(0.91, 0.94)
101	--	nlr.m3	sp	0.16	(0.13, 0.18)	0.13	(0.11, 0.14)	0.13	(0.11, 0.14)	0.14	(0.12, 0.16)
102	--	nlr.m3	diag.acc	0.66	(0.64, 0.68)	0.3	(0.29, 0.32)	0.32	(0.3, 0.34)	0.48	(0.46, 0.5)
103	--	nlr.m3	diag.or	1.85	(1.45, 2.37)	2.1	(1.46, 3.02)	1.88	(1.34, 2.62)	2	(1.53, 2.61)
104	--	nlr.m3	youden	0.07	(0.03, 0.11)	0.06	(0.02, 0.1)	0.05	(0.02, 0.09)	0.07	(0.03, 0.1)
105	--	nlr.m3	ppv	0.69	(0.67, 0.71)	0.23	(0.21, 0.25)	0.25	(0.23, 0.27)	0.45	(0.43, 0.47)
106	5	nlr.m3	npv	0.46	(0.4, 0.51)	0.88	(0.83, 0.91)	0.85	(0.8, 0.89)	0.71	(0.65, 0.76)
107	5	nlr.m3	plr	1.08	(1.04, 1.11)	1.07	(1.04, 1.1)	1.06	(1.03, 1.09)	1.08	(1.05, 1.11)
108	--	nlr.m3	nlr	0.58	(0.47, 0.72)	0.51	(0.36, 0.71)	0.57	(0.42, 0.77)	0.54	(0.42, 0.69)
109	--	nlr.m9	se	0.54	(0.52, 0.57)	0.55	(0.51, 0.59)	0.6	(0.56, 0.64)	0.57	(0.54, 0.6)
110	--	nlr.m9	sp	0.63	(0.6, 0.66)	0.53	(0.51, 0.55)	0.55	(0.53, 0.57)	0.58	(0.55, 0.6)
111	--	nlr.m9	diag.acc	0.57	(0.55, 0.59)	0.54	(0.52, 0.56)	0.56	(0.54, 0.58)	0.57	(0.55, 0.59)
112	--	nlr.m9	diag.or	2.03	(1.72, 2.41)	1.39	(1.15, 1.68)	1.81	(1.5, 2.17)	1.79	(1.52, 2.09)
113	--	nlr.m9	youden	0.17	(0.12, 0.23)	0.08	(0.02, 0.15)	0.15	(0.08, 0.21)	0.14	(0.09, 0.2)
114	--	nlr.m9	ppv	0.75	(0.73, 0.78)	0.25	(0.22, 0.27)	0.29	(0.27, 0.32)	0.5	(0.48, 0.53)
115	5	nlr.m9	npv	0.4	(0.38, 0.43)	0.81	(0.79, 0.83)	0.81	(0.79, 0.83)	0.64	(0.61, 0.66)
116	5	nlr.m9	plr	1.47	(1.33, 1.62)	1.18	(1.08, 1.28)	1.32	(1.22, 1.44)	1.34	(1.24, 1.45)
117	--	nlr.m9	nlr	0.72	(0.67, 0.78)	0.84	(0.76, 0.93)	0.73	(0.66, 0.81)	0.75	(0.69, 0.81)
118	--	crp.m20	se	0.84	(0.82, 0.86)	0.84	(0.81, 0.87)	0.85	(0.82, 0.88)	0.84	(0.82, 0.86)
119	--	crp.m20	sp	0.3	(0.27, 0.33)	0.22	(0.2, 0.24)	0.22	(0.2, 0.24)	0.24	(0.22, 0.26)
120	--	crp.m20	diag.acc	0.66	(0.64, 0.68)	0.35	(0.33, 0.37)	0.37	(0.36, 0.39)	0.5	(0.48, 0.52)
121	--	crp.m20	diag.or	2.2	(1.81, 2.69)	1.44	(1.12, 1.85)	1.64	(1.28, 2.11)	1.67	(1.37, 2.05)
122	--	crp.m20	youden	0.14	(0.09, 0.19)	0.06	(0, 0.1)	0.07	(0.03, 0.12)	0.08	(0.04, 0.12)
123	--	crp.m20	ppv	0.71	(0.69, 0.73)	0.23	(0.21, 0.25)	0.26	(0.24, 0.28)	0.46	(0.43, 0.48)
124	5	crp.m20	npv	0.47	(0.43, 0.52)	0.83	(0.79, 0.86)	0.83	(0.79, 0.86)	0.67	(0.62, 0.71)
125	5	crp.m20	plr	1.19	(1.14, 1.25)	1.07	(1.03, 1.12)	1.1	(1.05, 1.14)	1.11	(1.06, 1.15)
126	--	crp.m20	nlr	0.54	(0.47, 0.63)	0.74	(0.6, 0.92)	0.67	(0.54, 0.82)	0.66	(0.56, 0.78)
127	--	crp.m100	se	0.46	(0.44, 0.49)	0.46	(0.42, 0.5)	0.5	(0.46, 0.54)	0.49	(0.46, 0.52)
128	--	crp.m100	sp	0.69	(0.65, 0.72)	0.6	(0.58, 0.62)	0.61	(0.59, 0.63)	0.64	(0.62, 0.67)
129	--	crp.m100	diag.acc	0.54	(0.52, 0.55)	0.57	(0.55, 0.59)	0.58	(0.57, 0.6)	0.58	(0.56, 0.6)
130	--	crp.m100	diag.or	1.89	(1.58, 2.25)	1.29	(1.06, 1.56)	1.56	(1.3, 1.88)	1.72	(1.46, 2.01)
131	--	crp.m100	youden	0.15	(0.09, 0.2)	0.06	(0, 0.13)	0.11	(0.05, 0.17)	0.13	(0.08, 0.19)
132	--	crp.m100	ppv	0.75	(0.73, 0.78)	0.24	(0.22, 0.27)	0.29	(0.26, 0.32)	0.51	(0.48, 0.54)
133	5	crp.m100	npv	0.38	(0.36, 0.41)	0.8	(0.78, 0.82)	0.79	(0.77, 0.81)	0.62	(0.6, 0.65)
134	5	crp.m100	plr	1.48	(1.32, 1.65)	1.15	(1.04, 1.28)	1.28	(1.16, 1.41)	1.37	(1.25, 1.5)
135	--	crp.m100	nlr	0.78	(0.73, 0.83)	0.9	(0.82, 0.98)	0.82	(0.75, 0.9)	0.8	(0.74, 0.85)
136	--	lct.m2	se	0.33	(0.3, 0.35)	0.41	(0.37, 0.46)	0.47	(0.43, 0.51)	0.55	(0.52, 0.58)
137	--	lct.m2	sp	0.72	(0.69, 0.75)	0.72	(0.7, 0.74)	0.74	(0.72, 0.76)	0.87	(0.85, 0.89)
138	--	lct.m2	diag.acc	0.46	(0.44, 0.48)	0.65	(0.63, 0.67)	0.67	(0.65, 0.69)	0.73	(0.72, 0.75)
139	--	lct.m2	diag.or	1.26	(1.05, 1.51)	1.8	(1.49, 2.19)	2.46	(2.04, 2.97)	8.35	(6.88, 10.14)
140	--	lct.m2	youden	0.05	(0, 0.1)	0.13	(0.07, 0.19)	0.2	(0.14, 0.26)	0.42	(0.37, 0.47)
141	--	lct.m2	ppv	0.71	(0.67, 0.74)	0.29	(0.26, 0.32)	0.36	(0.33, 0.39)	0.77	(0.73, 0.79)
142	5	lct.m2	npv	0.34	(0.32, 0.37)	0.82	(0.8, 0.83)	0.81	(0.79, 0.83)	0.72	(0.7, 0.74)
143	5	lct.m2	plr	1.18	(1.03, 1.34)	1.47	(1.3, 1.66)	1.78	(1.59, 1.99)	4.3	(3.73, 4.97)
144	--	lct.m2	nlr	0.93	(0.88, 0.98)	0.82	(0.76, 0.88)	0.72	(0.67, 0.78)	0.52	(0.48, 0.55)
145	--	lct.m3.9	se	0.1	(0.08, 0.11)	0.17	(0.14, 0.2)	0.17	(0.14, 0.2)	0.17	(0.15, 0.19)
146	--	lct.m3.9	sp	0.93	(0.91, 0.95)	0.94	(0.92, 0.95)	0.94	(0.93, 0.95)	0.97	(0.97, 0.98)
147	--	lct.m3.9	diag.acc	0.37	(0.35, 0.39)	0.77	(0.75, 0.79)	0.76	(0.74, 0.77)	0.63	(0.61, 0.65)
148	--	lct.m3.9	diag.or	1.41	(1.03, 1.93)	2.92	(2.19, 3.88)	3.22	(2.43, 4.26)	7.72	(5.37, 11.09)
149	--	lct.m3.9	youden	0.03	(-0.01, 0.06)	0.1	(0.06, 0.15)	0.11	(0.07, 0.15)	0.14	(0.11, 0.17)
150	--	lct.m3.9	ppv	0.74	(0.68, 0.8)	0.42	(0.35, 0.49)	0.47	(0.41, 0.54)	0.83	(0.78, 0.88)
151	5	lct.m3.9	npv	0.33	(0.31, 0.35)	0.8	(0.79, 0.82)	0.78	(0.76, 0.8)	0.61	(0.59, 0.63)
152	5	lct.m3.9	plr	1.37	(1.03, 1.83)	2.6	(2.03, 3.34)	2.84	(2.22, 3.64)	6.6	(4.68, 9.31)
153	--	lct.m3.9	nlr	0.97	(0.95, 1)	0.89	(0.86, 0.93)	0.88	(0.85, 0.92)	0.85	(0.83, 0.88)

## Sheet: sepsis_auc
#	Figure	marker	auc_sepsis.si	ci_sepsis.si	auc_sepsis.qs	ci_sepsis.qs	auc_sepsis.so	ci_sepsis.so	auc_sepsis.re	ci_sepsis.re
1	4	mdw	0.62	(0.59, 0.64)	0.59	(0.56, 0.61)	0.63	(0.6, 0.65)	0.58	(0.56, 0.61)
2	4	wbc	0.67	(0.65, 0.69)	0.53	(0.51, 0.56)	0.53	(0.5, 0.56)	0.57	(0.55, 0.6)
3	4	nlr	0.62	(0.6, 0.64)	0.57	(0.54, 0.59)	0.6	(0.57, 0.63)	0.6	(0.58, 0.63)
4	4	crp	0.62	(0.6, 0.65)	0.54	(0.52, 0.57)	0.58	(0.55, 0.61)	0.59	(0.56, 0.61)
5	4	lct	0.54	(0.51, 0.56)	0.61	(0.58, 0.64)	0.62	(0.6, 0.65)	0.74	(0.72, 0.76)
6	4	mdw_wbc	0.71	(0.69, 0.73)	0.59	(0.57, 0.62)	0.63	(0.61, 0.66)	0.61	(0.59, 0.64)
7	4	mdw_nlr	0.66	(0.64, 0.68)	0.6	(0.57, 0.62)	0.64	(0.62, 0.67)	0.62	(0.59, 0.64)
8	4	mdw_wbc_nlr	0.71	(0.69, 0.74)	0.6	(0.57, 0.62)	0.64	(0.62, 0.67)	0.63	(0.6, 0.65)
9	4	mdw_crp	0.64	(0.62, 0.66)	0.59	(0.56, 0.61)	0.63	(0.6, 0.65)	0.6	(0.58, 0.62)
10	4	mdw_lct	0.62	(0.59, 0.64)	0.62	(0.59, 0.65)	0.66	(0.64, 0.69)	0.74	(0.72, 0.76)

## Sheet: ad_hoc_infection
#	marker	rowname	Est_Infection	95%CI_Infection
1	mdw.m20	se	0.72	(0.7, 0.74)
2	mdw.m20	sp	0.64	(0.59, 0.7)
3	mdw.m20	diag.acc	0.71	(0.69, 0.73)
4	mdw.m20	diag.or	4.62	(3.58, 5.96)
5	mdw.m20	youden	0.36	(0.29, 0.44)
6	mdw.m20	ppv	0.94	(0.93, 0.95)
7	mdw.m20	npv	0.23	(0.2, 0.26)
8	mdw.m20	plr	2.02	(1.73, 2.35)
9	mdw.m20	nlr	0.44	(0.39, 0.49)
10	mdw	auc	0.72	(0.69, 0.75)

## Sheet: plots
	Sensitivity and specificity for MDW and other sepsis markers across different definitions
	Note this follows the data in 'sepsis_accuracy'
